# Supplementary material for: Modelling community-control strategies to protect hospital resources during an influenza pandemic in Ottawa, Canada
Source: PLOS journal article supplement (doi:10.1371/journal.pone.0179315), 2017-06-14
Supplement: S10 (10.1371/journal.pone.0179315.s010) [file journal.pone.0179315.s010]

## S9 Table. Results of Sensitivity Analysis

Tables S9.1–S9.4 present outcome measure counts for best-guess (BG), worst-case (WC), and best-case (BC) scenarios for each individual intervention. Below each WC and BC scenario is a measure of the percent change in each outcome measure, relative to the BG scenario. Sensitivity analysis were conducted across four pandemic scenarios where transmissibility was calculated to approximate an  $R_0$  of either 1.65 (1957 pandemic) or 1.80 (1918 pandemic) and the hospitalization rate was calibrated to approximate a rate of either 0.4% or 1.0%

**Table S9.1. Sensitivity of health outcome predictions to change in intervention parameter assumptions for a pandemic strain with the transmissibility of the 1957 pandemic and a hospitalization rate of 0.4%**

| Intervention    | Measure        | Outcome           |                  |        |                      |                 |        |
|-----------------|----------------|-------------------|------------------|--------|----------------------|-----------------|--------|
|                 |                | Symptomatic Cases | Hospitalizations | ICU    | Peak Hospital Demand | Peak ICU Demand | Deaths |
| No Intervention | Count          | 677,545.6         | 2,472.0          | 579.8  | 13.8                 | 90.2            | 363.0  |
| SC — BG         | Count          | 669,919.6         | 2,430.1          | 570.1  | 13.3                 | 87.2            | 355.3  |
| SC — WC         | Count          | 682,470.7         | 2,480.2          | 581.8  | 14.0                 | 91.3            | 364.9  |
|                 | Percent change | 1.9%              | 2.1%             | 2.0%   | 5.0%                 | 4.6%            | 2.7%   |
| SC — BC         | Count          | 643,517.9         | 2,321.0          | 544.9  | 12.1                 | 79.9            | 334.9  |
|                 | Percent change | -3.9%             | -4.5%            | -4.4%  | -9.0%                | -8.4%           | -5.7%  |
| CCR — BG        | Count          | 673,282.2         | 2,452.3          | 575.8  | 13.6                 | 89.0            | 358.3  |
| CCR — WC        | Count          | 675,443.6         | 2,462.3          | 577.8  | 13.7                 | 89.6            | 360.7  |
|                 | Percent change | 0.3%              | 0.4%             | 0.4%   | 0.8%                 | 0.7%            | 0.7%   |
| CCR — BC        | Count          | 671,058.4         | 2,442.0          | 573.7  | 13.5                 | 88.4            | 355.8  |
|                 | Percent change | -0.6%             | -0.8%            | -0.7%  | -1.6%                | -1.3%           | -1.4%  |
| PPM — BG        | Count          | 566,467.1         | 1,956.7          | 464.3  | 10.5                 | 70.2            | 249.9  |
| PPM — WC        | Count          | 673,750.5         | 2,454.6          | 576.2  | 13.6                 | 89.1            | 358.9  |
|                 | Percent change | 18.9%             | 25.4%            | 24.1%  | 29.7%                | 26.9%           | 43.6%  |
| PPM — BC        | Count          | 106,153.1         | 3,12.3           | 71.3   | 2.8                  | 15.4            | 30.9   |
|                 | Percent change | -81.3%            | -84.0%           | -84.6% | -73.5%               | -78.0%          | -87.6% |
| VI — BG         | Count          | 429,992.9         | 1,479.9          | 355.4  | 0.7                  | 4.7             | 184.5  |
| VI — WC         | Count          | 508,807.0         | 1,789.6          | 426.6  | 2.3                  | 15.6            | 236.4  |
|                 | Percent change | 18.3%             | 20.9%            | 20.0%  | 237.6%               | 233.5%          | 28.1%  |

|          |                |           |         |        |        |        |        |
|----------|----------------|-----------|---------|--------|--------|--------|--------|
| VI — BC  | Count          | 407,053.3 | 1,391.4 | 335.1  | 0.4    | 2.5    | 170.1  |
|          | Percent change | -20.0%    | -22.2%  | -21.4% | -84.5% | -84.3% | -28.0% |
| Q — BG   | Count          | 422,402.4 | 1,448.9 | 348.1  | 0.7    | 4.6    | 179.2  |
| Q — WC   | Count          | 503,849.9 | 1,768.5 | 421.8  | 2.3    | 15.4   | 232.4  |
|          | Percent change | 19.3%     | 22.1%   | 21.2%  | 239.4% | 235.3% | 29.7%  |
| Q — BC   | Count          | 398,705.2 | 1,357.8 | 327.2  | 0.4    | 2.4    | 164.6  |
|          | Percent change | -5.6%     | -6.3%   | -6.0%  | -47.8% | -47.7% | -8.1%  |
| V — BG   | Count          | 624,359.9 | 909.7   | 213.9  | 4.9    | 32.1   | 131.7  |
| V — WC   | Count          | 667,013.6 | 1,827.8 | 428.7  | 10.1   | 66.4   | 268.4  |
|          | Percent change | 6.8%      | 100.9%  | 100.4% | 108.4% | 107.2% | 103.8% |
| V — BC   | Count          | 4,375.1   | 1.4     | 0.3    | 0.0    | 0.0    | 0.2    |
|          | Percent change | -99.3%    | -99.8%  | -99.8% | -99.9% | -99.9% | -99.9% |
| AVT — BG | Count          | 676,261.7 | 2,218.6 | 520.4  | 12.4   | 80.9   | 325.6  |
| AVT — WC | Count          | 676,838.9 | 2,468.1 | 578.9  | 13.8   | 90.0   | 362.3  |
|          | Percent change | 0.1%      | 11.2%   | 11.2%  | 11.3%  | 11.3%  | 11.3%  |
| AVT — BC | Count          | 676,720.4 | 1,481.7 | 347.5  | 8.3    | 54.0   | 217.6  |
|          | Percent change | 0.0%      | 0.0%    | 0.1%   | 5.4%   | 0.8%   | 0.2%   |
| AVP — BG | Count          | 658,479.8 | 2,110.8 | 495.4  | 11.4   | 74.7   | 305.6  |
| AVP — WC | Count          | 658,842.0 | 2,422.4 | 568.0  | 13.3   | 87.3   | 353.6  |
|          | Percent change | 0.1%      | 14.8%   | 14.7%  | 17.3%  | 16.8%  | 15.7%  |
| AVP — BC | Count          | 673,938.2 | 1,385.8 | 325.0  | 7.4    | 48.8   | 200.3  |
|          | Percent change | 2.3%      | -34.3%  | -34.4% | -34.7% | -34.6% | -34.5% |

**Table S9.2. Sensitivity of health outcome predictions to change in intervention parameter assumptions for a pandemic strain with the transmissibility of the 1918 pandemic and a hospitalization rate of 0.4%**

| Intervention    | Measure        | Outcome           |                  |        |                      |                 |        |
|-----------------|----------------|-------------------|------------------|--------|----------------------|-----------------|--------|
|                 |                | Symptomatic Cases | Hospitalizations | ICU    | Peak Hospital Demand | Peak ICU Demand | Deaths |
| No Intervention | Count          | 713,919.5         | 2,632.9          | 612.4  | 16.0                 | 103.1           | 400.2  |
| SC — BG         | Count          | 708,301.8         | 2,603.5          | 605.4  | 15.5                 | 100.1           | 395.2  |
| SC — WC         | Count          | 717,502.1         | 2,637.2          | 613.4  | 16.2                 | 104.0           | 401.1  |
|                 | Percent change | 1.3%              | 1.3%             | 1.3%   | 4.4%                 | 3.9%            | 1.5%   |
| SC — BC         | Count          | 688,700.8         | 2,526.6          | 587.7  | 14.3                 | 92.8            | 381.3  |
|                 | Percent change | -2.8%             | -3.0%            | -2.9%  | -8.0%                | -7.2%           | -3.5%  |
| CCR — BG        | Count          | 711,061.4         | 2,620.7          | 609.9  | 15.8                 | 101.8           | 397.4  |
| CCR — WC        | Count          | 712,504.5         | 2,626.9          | 611.1  | 15.9                 | 102.5           | 398.8  |
|                 | Percent change | 0.2%              | 0.2%             | 0.2%   | 0.6%                 | 0.7%            | 0.3%   |
| CCR — BC        | Count          | 709,592.0         | 2,596.2          | 391.7  | 15.6                 | 73.0            | 605.0  |
|                 | Percent change | -0.4%             | -1.2%            | -35.9% | -1.9%                | -28.8%          | 51.7%  |
| PPM — BG        | Count          | 651,004.0         | 2,348.7          | 553.9  | 12.7                 | 83.4            | 333.9  |
| PPM — WC        | Count          | 711,370.9         | 2,622.0          | 610.1  | 15.8                 | 102.0           | 397.7  |
|                 | Percent change | 9.3%              | 11.6%            | 10.2%  | 25.1%                | 22.3%           | 19.1%  |
| PPM — BC        | Count          | 281,302.8         | 858.7            | 198.5  | 6.9                  | 41.5            | 88.2   |
|                 | Percent change | -56.8%            | -63.4%           | -64.2% | -45.7%               | -50.3%          | -73.6% |
| VI — BG         | Count          | 517,475.0         | 1,855.1          | 442.1  | 0.9                  | 5.8             | 255.9  |
| VI — WC         | Count          | 581,944.8         | 2,112.3          | 498.9  | 2.9                  | 19.0            | 303.2  |
|                 | Percent change | 12.5%             | 13.9%            | 12.8%  | 232.9%               | 228.8%          | 18.5%  |
| VI — BC         | Count          | 498,423.1         | 1,779.5          | 425.4  | 0.5                  | 3.0             | 242.1  |
|                 | Percent change | -14.4%            | -15.8%           | -14.7% | -84.3%               | -84.0%          | -20.1% |
| Q — BG          | Count          | 512,432.0         | 1,833.7          | 437.4  | 0.9                  | 5.7             | 251.6  |
| Q — WC          | Count          | 578,733.5         | 2,098.7          | 496.0  | 2.9                  | 18.8            | 300.4  |
|                 | Percent change | 12.9%             | 14.5%            | 13.4%  | 234.7%               | 230.4%          | 19.4%  |
| Q — BC          | Count          | 492,790.4         | 1,755.7          | 420.1  | 0.4                  | 3.0             | 237.5  |
|                 | Percent change | -3.8%             | -4.3%            | -3.9%  | -47.7%               | -47.6%          | -5.6%  |

|          |                |           |         |        |        |        |        |
|----------|----------------|-----------|---------|--------|--------|--------|--------|
| V — BG   | Count          | 670,681.0 | 991.2   | 230.9  | 5.8    | 37.5   | 149.8  |
| V — WC   | Count          | 706,942.8 | 1,958.6 | 455.5  | 11.9   | 76.5   | 297.7  |
|          | Percent change | 5.4%      | 97.6%   | 97.3%  | 105.4% | 103.9% | 98.8%  |
| V — BC   | Count          | 13,155.2  | 4.1     | 0.9    | 0.0    | 0.2    | 0.4    |
|          | Percent change | -98.0%    | -99.6%  | -99.6% | -99.5% | -99.6% | -99.7% |
| AVT — BG | Count          | 712,964.6 | 2,364.7 | 550.0  | 14.4   | 92.5   | 359.3  |
| AVT — WC | Count          | 713,372.2 | 2,629.7 | 611.7  | 16.0   | 102.9  | 399.6  |
|          | Percent change | 0.1%      | 11.2%   | 11.2%  | 11.3%  | 11.3%  | 11.2%  |
| AVT — BC | Count          | 713,307.3 | 1,579.0 | 367.2  | 9.6    | 61.8   | 240.0  |
|          | Percent change | 0.0%      | 0.0%    | 0.1%   | 4.7%   | 0.7%   | 0.2%   |
| AVP — BG | Count          | 702,167.6 | 2,285.8 | 531.6  | 13.4   | 87.0   | 345.1  |
| AVP — WC | Count          | 698,623.8 | 2,596.4 | 603.6  | 15.6   | 100.5  | 393.4  |
|          | Percent change | -0.5%     | 13.6%   | 13.5%  | 16.1%  | 15.5%  | 14.0%  |
| AVP — BC | Count          | 717,796.4 | 1,505.3 | 349.9  | 8.8    | 57.0   | 227.0  |
|          | Percent change | 2.2%      | -34.1%  | -34.2% | -34.5% | -34.5% | -34.2% |

**Table S9.3. Sensitivity of health outcome predictions to change in intervention parameter assumptions for a pandemic strain with the transmissibility of the 1957 pandemic and hospitalization rate of 1.0%**

| Intervention    | Measure        | Outcome           |                  |         |                      |                 |        |
|-----------------|----------------|-------------------|------------------|---------|----------------------|-----------------|--------|
|                 |                | Symptomatic Cases | Hospitalizations | ICU     | Peak Hospital Demand | Peak ICU Demand | Deaths |
| No Intervention | Count          | 675,698.9         | 4,893.4          | 1,148.8 | 27.3                 | 178.5           | 717.1  |
| SC — BG         | Count          | 667,946.9         | 4,808.6          | 1,129.2 | 26.3                 | 172.5           | 701.5  |
| SC — WC         | Count          | 680,669.8         | 4,909.8          | 1,152.8 | 27.6                 | 180.6           | 720.8  |
|                 | Percent change | 1.9%              | 2.1%             | 2.1%    | 5.1%                 | 4.7%            | 2.8%   |
| SC — BC         | Count          | 641,209.9         | 4,589.0          | 1,078.4 | 23.9                 | 157.9           | 660.4  |
|                 | Percent change | -4.0%             | -4.6%            | -4.5%   | -9.0%                | -8.5%           | -5.9%  |
| CCR — BG        | Count          | 671,368.1         | 4,853.8          | 1,140.7 | 26.9                 | 176.0           | 707.6  |
| CCR — WC        | Count          | 673,563.9         | 4,873.9          | 1,144.8 | 27.1                 | 177.1           | 712.5  |
|                 | Percent change | 0.3%              | 0.4%             | 0.4%    | 0.8%                 | 0.6%            | 0.7%   |
| CCR — BC        | Count          | 669,108.4         | 4,833.1          | 1,136.4 | 26.6                 | 174.8           | 702.7  |
|                 | Percent change | -0.7%             | -0.8%            | -0.7%   | -1.6%                | -1.3%           | -1.4%  |
| PPM — BG        | Count          | 562,395.5         | 3,853.2          | 914.8   | 20.7                 | 138.7           | 490.0  |
| PPM — WC        | Count          | 671,844.6         | 4,858.4          | 1,141.5 | 26.9                 | 176.3           | 708.8  |
|                 | Percent change | 19.5%             | 26.1%            | 24.8%   | 29.9%                | 27.1%           | 44.7%  |
| PPM — BC        | Count          | 102,187.0         | 597.9            | 136.5   | 5.3                  | 29.5            | 59.2   |
|                 | Percent change | -81.8%            | -84.5%           | -85.1%  | -74.3%               | -78.7%          | -87.9% |
| VI — BG         | Count          | 426,327.9         | 2,910.6          | 699.5   | 1.4                  | 9.3             | 361.2  |
| VI — WC         | Count          | 505,743.8         | 3,529.0          | 842.0   | 4.6                  | 31.0            | 464.4  |
|                 | Percent change | 18.6%             | 21.2%            | 20.4%   | 237.5%               | 233.5%          | 28.6%  |
| VI — BC         | Count          | 403,230.5         | 2,734.3          | 659.0   | 0.7                  | 4.9             | 332.8  |
|                 | Percent change | -20.3%            | -22.5%           | -21.7%  | -84.5%               | -84.3%          | -28.3% |
| Q — BG          | Count          | 418,648.4         | 2,848.6          | 684.8   | 1.3                  | 9.1             | 350.8  |
| Q — WC          | Count          | 500,721.9         | 3,486.8          | 832.2   | 4.6                  | 30.6            | 456.5  |
|                 | Percent change | 19.6%             | 22.4%            | 21.5%   | 239.3%               | 235.4%          | 30.1%  |
| Q — BC          | Count          | 394,791.5         | 2,667.0          | 643.0   | 0.7                  | 4.8             | 321.9  |
|                 | Percent change | -5.7%             | -6.4%            | -6.1%   | -47.8%               | -47.7%          | -8.2%  |

|          |                |           |         |         |        |        |        |
|----------|----------------|-----------|---------|---------|--------|--------|--------|
| V — BG   | Count          | 623,468.2 | 1,811.3 | 426.0   | 9.7    | 63.8   | 262.0  |
| V — WC   | Count          | 665,541.0 | 3,626.8 | 851.2   | 20.1   | 131.7  | 531.8  |
|          | Percent change | 6.7%      | 100.2%  | 99.8%   | 107.5% | 106.4% | 103.0% |
| V — BC   | Count          | 4,357.5   | 2.8     | 0.7     | 0.0    | 0.1    | 0.3    |
|          | Percent change | -99.3%    | -99.8%  | -99.8%  | -99.8% | -99.9% | -99.9% |
| AVT — BG | Count          | 674,591.3 | 4,396.2 | 1,032.1 | 24.5   | 160.2  | 643.9  |
| AVT — WC | Count          | 674,988.5 | 4,885.7 | 1,147.1 | 27.2   | 178.1  | 715.7  |
|          | Percent change | 0.1%      | 11.1%   | 11.1%   | 11.2%  | 11.2%  | 11.2%  |
| AVT — BC | Count          | 675,608.4 | 2,945.2 | 691.0   | 16.4   | 107.3  | 431.9  |
|          | Percent change | 0.0%      | 0.0%    | 0.1%    | 2.7%   | 0.4%   | 0.1%   |
| AVP — BG | Count          | 656,540.0 | 4,180.5 | 981.9   | 22.5   | 147.9  | 603.9  |
| AVP — WC | Count          | 656,880.9 | 4,794.2 | 1,125.2 | 26.3   | 172.6  | 698.3  |
|          | Percent change | 0.1%      | 14.7%   | 14.6%   | 17.1%  | 16.7%  | 15.6%  |
| AVP — BC | Count          | 672,615.9 | 2,753.5 | 646.1   | 14.7   | 97.0   | 397.3  |
|          | Percent change | 2.4%      | -34.1%  | -34.2%  | -34.5% | -34.4% | -34.2% |

**Table S9.4. Sensitivity of health outcome predictions to change in intervention parameter assumptions for a pandemic strain with the transmissibility of the 1918 pandemic and hospitalization rate of 1.0%**

| Intervention    | Measure        | Outcome           |                  |         |                      |                 |        |
|-----------------|----------------|-------------------|------------------|---------|----------------------|-----------------|--------|
|                 |                | Symptomatic Cases | Hospitalizations | ICU     | Peak Hospital Demand | Peak ICU Demand | Deaths |
| No Intervention | Count          | 712,553.4         | 5,216.9          | 1,214.4 | 31.7                 | 204.2           | 791.7  |
| SC — BG         | Count          | 706,873.6         | 5,157.4          | 1,200.3 | 30.7                 | 198.1           | 781.7  |
| SC — WC         | Count          | 716,149.3         | 5,225.3          | 1,216.5 | 32.0                 | 206.1           | 793.6  |
|                 | Percent change | 1.3%              | 1.3%             | 1.3%    | 4.4%                 | 4.0%            | 1.5%   |
| SC — BC         | Count          | 687,160.4         | 5,003.9          | 1,165.0 | 28.2                 | 183.8           | 754.1  |
|                 | Percent change | -2.8%             | -3.0%            | -2.9%   | -8.0%                | -7.2%           | -3.5%  |
| CCR — BG        | Count          | 709,661.9         | 5,192.2          | 1,209.4 | 31.3                 | 201.6           | 786.2  |
| CCR — WC        | Count          | 711,121.9         | 5,204.7          | 1,211.9 | 31.5                 | 202.9           | 789.0  |
|                 | Percent change | 0.2%              | 0.2%             | 0.2%    | 0.7%                 | 0.6%            | 0.4%   |
| CCR — BC        | Count          | 708,172.2         | 5,179.5          | 1,206.9 | 31.0                 | 200.6           | 783.3  |
|                 | Percent change | -0.4%             | -0.5%            | -0.4%   | -1.4%                | -1.2%           | -0.7%  |
| PPM — BG        | Count          | 648,707.8         | 4,644.8          | 1,096.4 | 25.0                 | 164.9           | 658.5  |
| PPM — WC        | Count          | 709,975.7         | 5,195.0          | 1,209.9 | 31.3                 | 201.9           | 786.9  |
|                 | Percent change | 9.4%              | 11.8%            | 10.4%   | 25.2%                | 22.4%           | 19.5%  |
| PPM — BC        | Count          | 274,245.3         | 1,661.5          | 384.1   | 13.4                 | 80.5            | 170.2  |
|                 | Percent change | -57.7%            | -64.2%           | -65.0%  | -46.5%               | -51.2%          | -74.2% |
| VI — BG         | Count          | 515,054.4         | 3,664.3          | 874.1   | 1.7                  | 11.5            | 503.9  |
| VI — WC         | Count          | 579,966.5         | 4,178.2          | 987.8   | 5.7                  | 37.8            | 598.3  |
|                 | Percent change | 12.6%             | 14.0%            | 13.0%   | 232.7%               | 228.9%          | 18.7%  |
| VI — BC         | Count          | 495,861.7         | 3,513.3          | 840.7   | 0.9                  | 6.0             | 476.6  |
|                 | Percent change | -14.5%            | -15.9%           | -14.9%  | -84.2%               | -84.0%          | -20.4% |
| Q — BG          | Count          | 509,956.5         | 3,621.5          | 864.6   | 1.7                  | 11.3            | 495.5  |
| Q — WC          | Count          | 576,724.8         | 4,151.0          | 981.9   | 5.7                  | 37.4            | 592.8  |
|                 | Percent change | 13.1%             | 14.6%            | 13.6%   | 235.0%               | 230.1%          | 19.6%  |
| Q — BC          | Count          | 490,166.7         | 3,465.6          | 830.0   | 0.9                  | 5.9             | 467.3  |
|                 | Percent change | -3.9%             | -4.3%            | -4.0%   | -47.6%               | -47.6%          | -5.7%  |

|          |                |           |         |         |        |        |        |
|----------|----------------|-----------|---------|---------|--------|--------|--------|
| V — BG   | Count          | 670,041.2 | 1,974.5 | 460.0   | 11.5   | 74.7   | 298.2  |
| V — WC   | Count          | 705,855.8 | 3,889.3 | 905.1   | 23.6   | 152.0  | 590.5  |
|          | Percent change | 5.3%      | 97.0%   | 96.7%   | 104.5% | 103.3% | 98.1%  |
| V — BC   | Count          | 13,099.8  | 8.1     | 1.9     | 0.1    | 0.3    | 0.9    |
|          | Percent change | -98.0%    | -99.6%  | -99.6%  | -99.5% | -99.6% | -99.7% |
| AVT — BG | Count          | 711,731.3 | 4,689.8 | 1,091.6 | 28.4   | 183.3  | 711.7  |
| AVT — WC | Count          | 712,004.8 | 5,210.5 | 1,213.0 | 31.6   | 203.8  | 790.6  |
|          | Percent change | 0.0%      | 11.1%   | 11.1%   | 11.2%  | 11.2%  | 11.1%  |
| AVT — BC | Count          | 712,485.2 | 3,140.2 | 730.6   | 19.0   | 122.8  | 476.9  |
|          | Percent change | 0.0%      | 0.0%    | 0.1%    | 2.4%   | 0.4%   | 0.1%   |
| AVP — BG | Count          | 700,792.0 | 4,532.4 | 1,055.0 | 26.6   | 172.3  | 683.2  |
| AVP — WC | Count          | 697,189.4 | 5,144.1 | 1,196.9 | 30.8   | 198.9  | 778.2  |
|          | Percent change | -0.5%     | 13.5%   | 13.5%   | 16.0%  | 15.4%  | 13.9%  |
| AVP — BC | Count          | 716,872.9 | 2,993.1 | 696.0   | 17.5   | 113.3  | 450.9  |
|          | Percent change | 2.3%      | -34.0%  | -34.0%  | -34.3% | -34.3% | -34.0% |
